# Supplementary material
Source: PubMed Central journal article supplement (PMC6198335)
Supplement: DB171006SupplementaryData.pdf [file DB171006SupplementaryData.pdf]

SUPPLEMENTARY DATA

**Supplementary Figure S1. DNA damage response in pancreata of recently diagnosed T1D patients.**

A. The activation pattern of DDR proteins in mice following gamma irradiation. Wild type mice were subjected to 5 grey gamma irradiation and were sacrificed at different time points. Changes in markers of DDR were monitored using immunofluorescence to  $\gamma$ H2AX and 53BP1. An atypical large focal form of  $\gamma$ H2AX (white arrows) is found in beta cells regardless of a genotoxic condition. Note that these foci disperse at 4h past gamma irradiation and later reform.

B. The fraction of beta cells with activated 53BP1 in healthy donors originating in the nPOD repository (black dots, n=7) or at the Powers group (green squares, n=5). Each dot represents an individual case.

C. The fraction of beta cells with activated 53BP1 in recently diagnosed T1D donors originating in the nPOD repository (black dots, n=3) or at the DiViD study (pink triangles, n=4). Each dot represents an individual case.

D. The fraction of beta cells with activated 53BP1 in samples originating solely from the nPOD repository. Samples groups are healthy donors (n=7), people at risk for T1D (AAB+, n=20), recently diagnosed T1D patients (n=3) and established T1D patients (n=18). Each dot represents an individual case, p-values inside brackets are from include all three tissue sources (nPOD, Powers and DiViD).

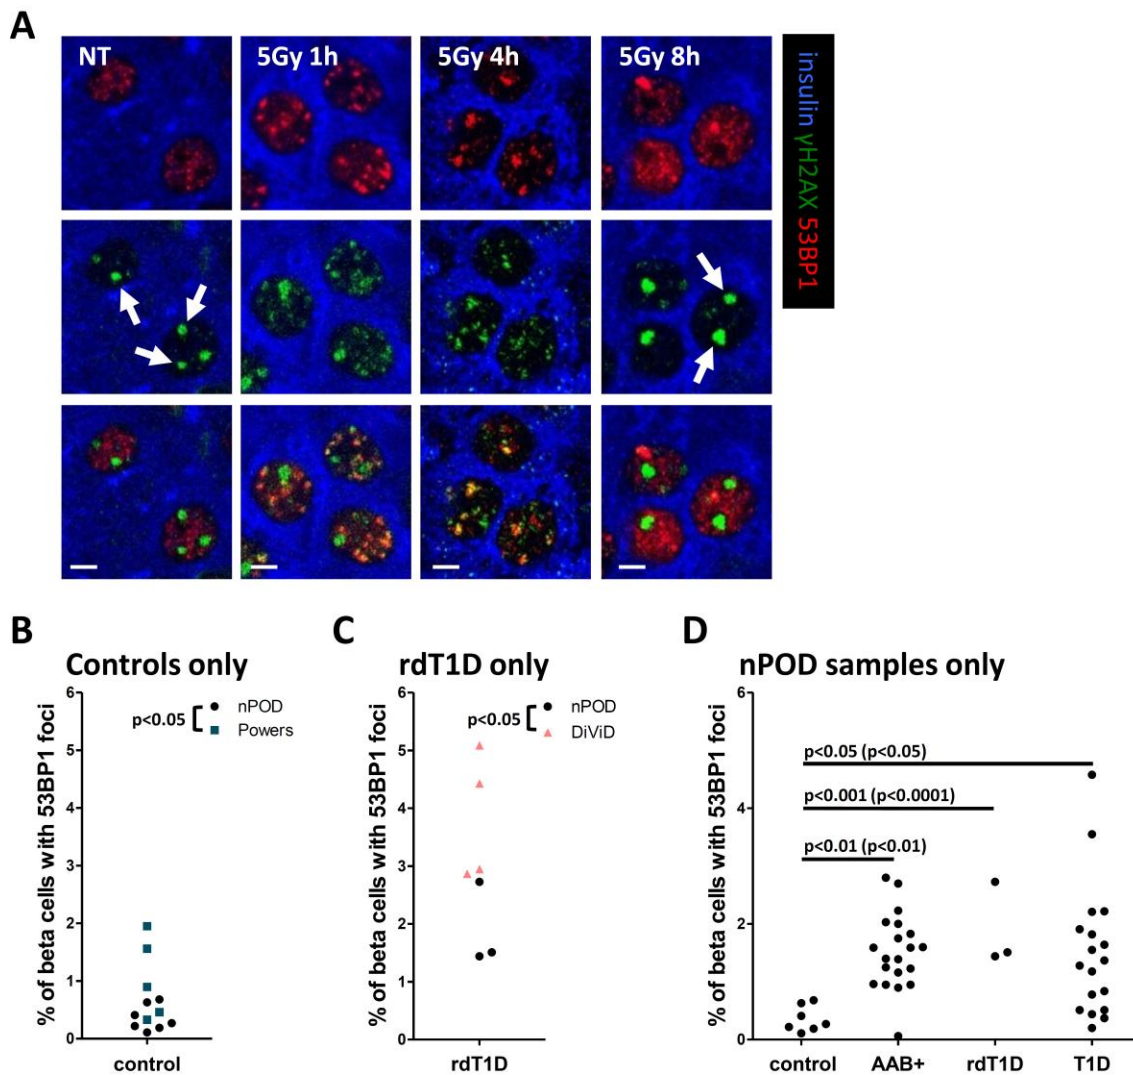

SUPPLEMENTARY DATA

**Supplementary Figure S2. Classification of islets from recently diagnosed T1D patients according to the extent of inflammatory infiltrate.**

A. 53BP1 foci in cells of the exocrine pancreas. 53BP1 pattern was assessed on samples from recently diagnosed T1D patients (n=8), long standing T1D (N=12) and healthy control donors (n=13). Each dot represents an individual case.

B. Quantification of 53BP1 nuclear foci in glucagon positive cells on pancreas samples from recent T1D (n=5) and healthy control donors (n=11). Each dot represents an individual case.

C. Immunofluorescent staining for beta cells (insulin, green) and immune cells (CD45, red). The degree of infiltrate is determined by both the amount of CD45 cells surrounding the islet and their level of islet penetrance. Infiltrate definitions were: minor - up to three CD45+ cells in the islet periphery; mild - spread CD45+ cells (up to ~20) with some intra-islet infiltration; moderate - aggregated CD45+ cells (~20 cell or more) with intra-islet infiltration; severe - large aggregations of CD45+ cells with intra-islet infiltration. Scale bars, 10µm.

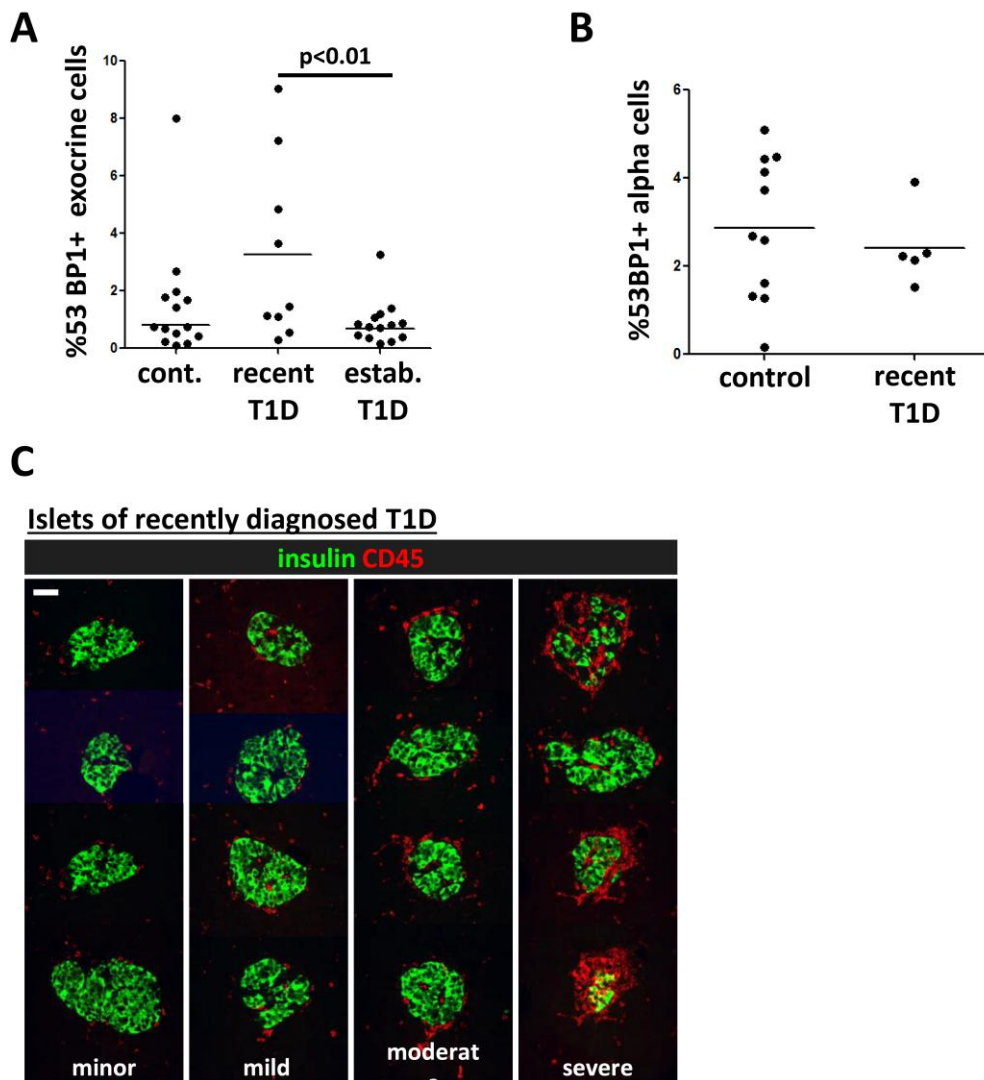

SUPPLEMENTARY DATA

**Supplementary Figure S3. Beta cell conditional deletion of the gene for *Atm*, and lack of effect in RIP-Cre single transgenic mice.**

A. ATM genomic deletion in islets of ATMf/f; insulin-Cre mice. PCR was performed of DNA from islets of wild type (WT), control (CTL, ATMf/f) and Insulin-Cre; ATMf/f (ATM $\Delta$ BC) mice. A deletion product can be found only in the presence of Cre recombinase and the floxed ATM allele. Arrow indicate the location of genotyping PCR primers for each panel. Recombination deletes exons 57+58 of ATM.

B. qPCR analysis of the *Atm* transcript in control (CTL) and ATM $\Delta$ BC mice. RNA was isolated from whole islets.

C. Immunostaining for the phosphorylated form of the ATM substrate Kap1. Control and mutant mice were non-treated (NT) or gamma irradiated (5Gy), and sacrificed 1 hour later. Note that in the mutants, acinar cells stain positive but islet cells are negative, consistent with lack of ATM. Scale bars, 20 $\mu$ m.

D. Hyperglycemia-free survival curve of control (CTL, n=5) and Rip-Cre (n=4) mice subjected to MLDS.

E. Average blood glucose levels of control (CTL, n=5) and Rip-Cre (n=4) mice subjected to MLDS. Day 0 is the first day of 5 consecutive daily low dose STZ injections. Bars represent one SEM.

F. Growth hormone immunostaining of pituitary gland (PG), and the pancreas of control and RIP-Cre mice.

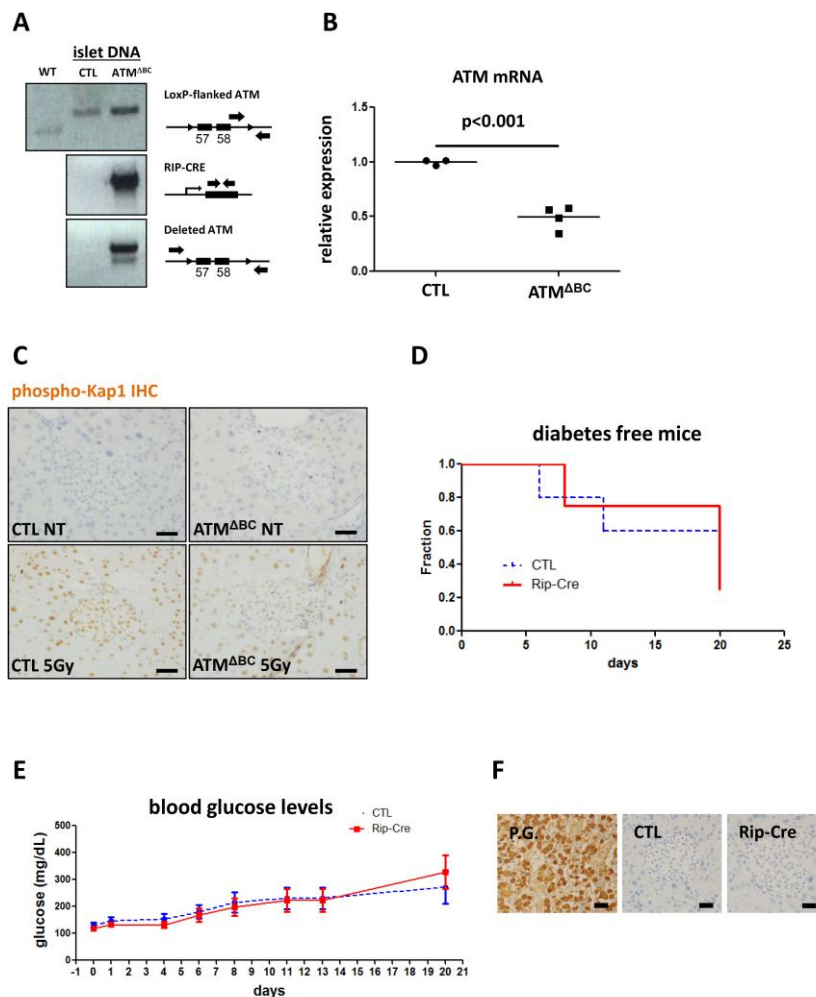

SUPPLEMENTARY DATA

**Supplementary Table S1. donor details**

| <b>CasID</b> | <b>Donor Type</b> | <b>source</b> |
|--------------|-------------------|---------------|
| BG11201122   | rdT1D             | DiViD         |
| BG1160791    | rdT1D             | DiViD         |
| BG1248382    | rdT1D             | DiViD         |
| BG1251891    | rdT1D             | DiViD         |
| H1758        | rdT1D             | DiViD         |
| BG12160361   | rdT1D             | DiViD         |
| 6380         | rdT1D             | nPOD          |
| 6362         | rdT1D             | nPOD          |
| 6228         | rdT1D             | nPOD          |
| 6027         | AAB+              | nPOD          |
| 6044         | AAB+              | nPOD          |
| 6080         | AAB+              | nPOD          |
| 6101         | AAB+              | nPOD          |
| 6154         | AAB+              | nPOD          |
| 6156         | AAB+              | nPOD          |
| 6158         | AAB+              | nPOD          |
| 6167         | AAB+              | nPOD          |
| 6170         | AAB+              | nPOD          |
| 6181         | AAB+              | nPOD          |
| 6184         | AAB+              | nPOD          |
| 6310         | AAB+              | nPOD          |
| 6023         | AAB+              | nPOD          |
| 503          | AAB+              | nPOD          |
| 6123         | AAB+              | nPOD          |
| 6147         | AAB+              | nPOD          |
| 6171         | AAB+              | nPOD          |
| 6197         | AAB+              | nPOD          |
| 6303         | AAB+              | nPOD          |
| 6267         | AAB+              | nPOD          |
| 6070         | T1D               | nPOD          |
| 6081         | T1D               | nPOD          |
| 6121         | T1D               | nPOD          |
| 6175         | T1D               | nPOD          |
| 6196         | T1D               | nPOD          |
| 6198         | T1D               | nPOD          |
| 6211         | T1D               | nPOD          |
| 6224         | T1D               | nPOD          |
| 6247         | T1D               | nPOD          |
| 6263         | T1D               | nPOD          |
| 6306         | T1D               | nPOD          |
| 6307         | T1D               | nPOD          |
| 6302         | T1D               | nPOD          |
| 6325         | T1D               | nPOD          |
| 6337         | T1D               | nPOD          |
| 6342         | T1D               | nPOD          |
| 6371         | T1D               | nPOD          |
| 6173         | T1D               | nPOD          |
| 6034         | No diabetes       | nPOD          |
| 6178         | No diabetes       | nPOD          |
| 6234         | No diabetes       | nPOD          |
| 6235         | No diabetes       | nPOD          |
| 6058         | No diabetes       | nPOD          |
| 6292         | No diabetes       | nPOD          |
| 6060         | No diabetes       | nPOD          |
| AB12259      | No diabetes       | Powers lab    |
| ABHB279      | No diabetes       | Powers lab    |
| ACEZ011      | No diabetes       | Powers lab    |
| ACEZ381      | No diabetes       | Powers lab    |
| ACHM315      | No diabetes       | Powers lab    |

SUPPLEMENTARY DATA

**Supplementary Table S2. qPCR primers**

| Gene         | Species | Forward                     | Reverse                        |
|--------------|---------|-----------------------------|--------------------------------|
| Hprt         | mouse   | GTT AAG CAG TAC AGC CCC AAA | AGG GCA TAT CCA ACA ACA AAC TT |
| Ppia         | mouse   | CGCGTCTCCTTCGAGCTGTTTG      | TGTAAAGTCACCACCCTGGCACAT       |
| Atm          | mouse   | ATGCAGCAGGTCTCCAGATGT       | GTTCTGTGCACCACTCGAGAA          |
| Il1b         | mouse   | ACCTTCCAGGATGAGGACATGA      | CTAATGGGAACGTCACACACCA         |
| Cxcl10       | mouse   | CTCATCCTGCTGGGTCTGAGTG      | CCTATGGCCCTCATTCTCACTG         |
| Ccl3         | mouse   | TGACAAGCTCACCTCTGTAC        | GTAGGAGAAGCAGCAGGCAGTC         |
| Ccl4         | mouse   | AGACCAGCAGTCTTTGCTCCAA      | GCTGCTCAGTTCAACTCCAAGTC        |
| Ccl5         | mouse   | AAGTGCTCCAATCTTGCAATCG      | ACTTCTTCTCTGGGTTGGCACA         |
| Ccl11        | mouse   | GAGCTCCACAGCGCTTCTATTC      | TGGTCATGATAAAGCAGCAGGA         |
| Ptprc (CD45) | mouse   | TTCAAAGAAATGGGACTGCTGA      | TTTCATTCCATTGACCTTGTC          |
